# Supplementary material for: An evaluation of ocean color model estimates of marine primary productivity in coastal and pelagic regions across the globe
Source: Copernicus journal article supplement (doi:10.5194/bg-8-489-2011), 2011-02-22
Supplement: Supplementary file 1 [file bg-8-489-2011-supplement.zip]

## Supplementary Material

**Table S1.** Details for the various programs that collected *in situ* data.

| Region            | Program        | Description                                                                                 | Source                                                                                                            |
|-------------------|----------------|---------------------------------------------------------------------------------------------|-------------------------------------------------------------------------------------------------------------------|
| BATS              | BATS           | Bermuda-Atlantic Time-series Study                                                          | <a href="http://bats.bios.edu/">http://bats.bios.edu/</a>                                                         |
| NABE              | NABE           | North Atlantic Bloom Experiment                                                             | <a href="http://usjgofs.whoi.edu/jg/dir/jgofs/nabe/">http://usjgofs.whoi.edu/jg/dir/jgofs/nabe/</a>               |
| NEA               | OMEX I, II     | Ocean Margin Exchange                                                                       | T. Smyth                                                                                                          |
| Black Sea         | NATO SfP ODBMS | NATO Black Sea Ecosystem Processes and Forecasting / Operational Database Management System | Z. Finenko, National Academy of Sciences of Ukraine, Sevastopol                                                   |
| Mediterranean Sea | DYFAMED        | Atmospheric Dynamics and Fluxes in the Mediterranean Sea                                    | <a href="http://www.obs-vlfr.fr/cd_rom_dmtt/dyf_main.htm">http://www.obs-vlfr.fr/cd_rom_dmtt/dyf_main.htm</a>     |
| Mediterranean Sea | FRONTS         | Barcelona-Majorca transect                                                                  | M. Estrada and X. Moran, Institute of Marine Sciences, CSIC, Barcelona, Spain                                     |
| Mediterranean Sea | HIVERN         | Transects across the Catalan front                                                          | M. Estrada and X. Moran, Institute of Marine Sciences, CSIC, Barcelona, Spain                                     |
| Mediterranean Sea | PROSOPE        | Productivity of Oceanic Pelagic Systems                                                     | <a href="http://www.obs-vlfr.fr/cd_rom_dmtt/pr_main.htm">http://www.obs-vlfr.fr/cd_rom_dmtt/pr_main.htm</a>       |
| Mediterranean Sea | VARIMED        | Transects across the Catalan front                                                          | M. Estrada and X. Moran, Institute of Marine Sciences, CSIC, Barcelona, Spain                                     |
| Mediterranean Sea | ZSN-GN         | Zoological Station of Naples - Gulf of Naples                                               | M. Scardi                                                                                                         |
| Arabian Sea       | ASPS           | Arabian Sea Process Study                                                                   | <a href="http://www1.whoi.edu/research/arabian.html">http://www1.whoi.edu/research/arabian.html</a>               |
| HOT               | HOT            | Hawaii Ocean Time-series                                                                    | <a href="http://hahana.soest.hawaii.edu/hot/hot_jgofs.html">http://hahana.soest.hawaii.edu/hot/hot_jgofs.html</a> |
| Ross Sea          | AESOPS         | Antarctic Environment and Southern Ocean Process Study                                      | W. Smith                                                                                                          |
| Ross Sea          | CORSACS        | Controls on Ross Sea Algal Community Structure                                              | W. Smith                                                                                                          |
| WAP               | WAP (LTER-PAL) | Palmer Station Long-Term Ecological Research                                                | <a href="http://pal.lternet.edu/data/">http://pal.lternet.edu/data/</a>                                           |
| APFZ              | AESOPS         | Antarctic Environment and Southern Ocean Process Study                                      | <a href="http://www1.whoi.edu/southernobjects.html">http://www1.whoi.edu/southernobjects.html</a>                 |

## Appendix A: Detailed model descriptions

### 1. DI,WI model descriptions

Model 1: This model estimates NPP as:

$$\text{NPP [mg C m}^{-2} \text{ d}^{-1}] = [(\text{chl}_0 [\text{mg chl m}^{-3}])^{1/2}] \times 1000$$

(Eppley, 1985). It ignores any external forcing or changes in physiological state. While other models incorporate information regarding geography or forcing fields, this model assumes that the standing stock is sole determinant of photosynthetic rate. All biomass performs identically. This simplicity is inherently elegant because biomass is, for most of the ocean, an excellent indicator of nutrient supply and presence of light.

Model 2: This is the original Howard, Yoder, Ryan model (Howard and Yoder, 1997), which for many years was a standard MODIS algorithm. Maximum growth rate is parameterized as a function of SST according to Eppley (1972). NPP is integrated to the MLD rather than to the euphotic depth.

Model 3: This is a variant of the original Howard, Yoder, Ryan model (Howard and Yoder, 1997) which integrates photosynthesis to the euphotic depth as defined in Behrenfeld and Falkowski (1997) rather than to the MLD (Carr, 2002).

Model 4: This model is based on the formulation obtained through dimensional analysis by Platt and Sathyendranath (1993). The photosynthetic parameter ( $P_{\text{max}}^B$ ) is assigned by combining a temperature-dependent relationship for the maximum growth rate (Eppley, 1972) with a variable carbon to chlorophyll ratio following the statistical relationship of Cloern et al. (1995).

Model 5: This model uses an artificial neural network to perform a generalized nonlinear regression of NPP on several predictive variables, including latitude, longitude, day length, MLD, SST,  $P^B_{opt}$  (computed according to Behrenfeld and Falkowski (1997), PAR, and Chl-*a* (Scardi, 2000; Scardi, 2001).

Model 6: This Vertically Generalized Production Model (VGPM) (Behrenfeld and Falkowski 1997) variant uses the continuous function of Morel and Berthon (1989) to estimate total integrated Chl-*a*, which in turn is used to estimate the euphotic depth with the equations proposed by Morel and Maritorena (2001).

Model 7: This VGPM variant formulates  $P^B_{opt}$  as a function of SST and Chl-*a* (Kameda and Ishizaka, 2005; Yamada et al., 2005). The model is based on the assumption that phytoplankton consists of large and small phytoplankton groups, which have specific Chl-*a* productivities and temperature functions such that changes in Chl-*a* concentration depends on the abundance of large phytoplankton.

Model 8: The original VGPM developed by Behrenfeld and Falkowski (1997) is one of the most widely known and used NPP models. The maximum observed photosynthetic rate within the water column,  $P^B_{opt}$ , is obtained as a 7th-order polynomial of SST.

Model 9: This model only differs from Model 8 in that  $P^B_{opt}$  is estimated as an exponential function of temperature following Eppley (1972).

Model 10: This model (Tang et al., 2008) uses support vector machine (SVM) as the nonlinear transfer function between ocean primary productivity and Chl-*a* concentration, euphotic layer depth, PAR, maximum carbon fixation rate and day length. The maximum carbon fixation was estimated by using a seventh-order polynomial function of SST

(Behrenfeld and Falkowski, 1997). The euphotic layer depth was estimated using the integrated chlorophyll (Morel and Berthon, 1989).

Model 11: This model is similar to Model 13 (Tang et al., 2008) except that the maximum carbon fixation rate was estimated as a SVM-based nonlinear function of SST, Chl-*a* and PAR.

## 2. DR, WI model descriptions

Model 12: In this model the depth-distribution of PAR is given by an empirical equation of light attenuation, which is determined by  $chl_0$ . The depth-distribution of Chl-*a* is determined by an empirical equation of PAR and Chl-*a* along the PAR depth-distribution line in a log scale with estimating a chlorophyll maximum up to 0.1 % depth of PAR. Total productivity is empirically estimated and integrated from surface to 1 % euphotic zone and for a day light time as a function of SST, depth-dependent PAR, Chl-*a*, latitude, and seasons (Asanuma, 2006).

Model 13: Photosynthesis per unit Chl-*a* was determined using an optimality-based model of nitrogen allocation and photoacclimation (Armstrong, 2006); the optimality criterion was derived based on the photosynthesis model of Geider et al. (1998). Photoacclimation and nitrogen allocation were determined as a function of light and temperature; therefore both PAR and SST were used in the productivity algorithm. Maximum photosynthetic rates were based on NPP estimated for *T. weissflogii* in Armstrong [2006], and were assumed to have Eppley (1972) temperature dependence; photoacclimation parameters were also as in Armstrong (2006). Through the photoadaptation algorithm, Chl-*a* reflects nitrogen status, so that no assumptions about

nutrient limitation are needed. Chl-*a* concentration was assumed constant over the photic zone and equal to surface Chl-*a*, so that light decreases exponentially with depth. Photic zone depth (1% light) was determined from Chl-*a* concentration and assumed extinction coefficients. The photic zone was assumed to be well mixed and cells were assumed to be photoacclimated to the light level at the middle of the photic zone (10% of surface illumination light). Column productivity is the integral over the photic zone of (photosynthesis/Chl-*a*) x Chl-*a*.

Model 14: This is a variant of Model 13 where the photic zone was divided into two equal depth (photoacclimation) zones (10%-100% and 1%-10% surface illumination, respectively), and separate photoacclimation parameters were calculated for the upper and lower parts of the photic zone (31.6% and 3.16% surface illumination, respectively).

Model 15: The Ocean Productivity from Absorption and Light (OPAL) model generates profiles of chlorophyll estimated from surface chlorophyll based on Wozniak et al. (2003) and uses the absorption properties in the water column to vertically resolve estimates of light attenuation in approximately 100 strata within the euphotic zone. Absorption by pure water is assumed to be a constant value over PAR wavelengths; chlorophyll-specific phytoplankton absorption is parameterized empirically (Bricaud et al., 1998); absorption by photosynthetic pigments is distinguished from total absorption; and absorption by colored dissolved organic matter (CDOM) is calculated according to Kahru and Mitchell (2001). The chlorophyll-specific phytoplankton absorption is used to calculate productivity, while absorption by photosynthetic pigments, water, and CDOM are used to vertically resolve light attenuation. SST, which is used as a proxy for seasonal changes in the phytoplankton community, is related to the chlorophyll-specific

absorption coefficient. The quantum efficiency is obtained from a hyperbolic tangent and a constant  $\phi_{max}$ . Productivity is calculated for the 100 layers in the euphotic zone and summed to compute the integral daily productivity.

### 3. DR,WR model descriptions

Model 16: This is a spectral light-photosynthesis model published by Morel (1991). It is formulated using Chl-*a* specific wavelength-resolved absorption and quantum yield. Temperature dependence is given by the parameterization of  $P^B_{max}$ , which follows *Eppley* (1972). The Chl-*a* profile is determined to be well-mixed or stratified according to the ratio of MLD and the euphotic depth, and if stratified, assigned a gaussian profile as in Morel and Berthon (1989). Mean photo-physiological parameters are from Morel et al. (1996). The model is run in its 'satellite' version Antoine et al. (1996), where NPP is the product of integral biomass, the daily irradiance, and  $\psi^*$  (the cross-section of algae for photosynthesis per unit of areal Chl-*a* biomass). Lookup tables for  $\psi^*$  were previously generated using the full DR,WR model, and are used to increase computational efficiency.

Model 17: This is a variant of Model 16 that considers separately the micro-, nano-, and pico-phytoplankton size classes to determine NPP (specific parameterizations for the Chl-*a* vertical profile (Uitz et al., 2006) and for the photo-physiological parameters (Uitz et al., 2008).

Model 18: This model follows that of Platt and Sathyendranath (1988) as implemented at global scale by Longhurst et al. (1995). It uses biogeographical provinces to define the values of the parameters to describe the light-photosynthesis curve and the Chl-*a* depth profile. Photosynthetic parameters were updated using an extended data set provided by the Bedford Institute of Oceanography and an extensive literature review. Spectral surface irradiance is first estimated independently with the model of Gregg and Carder (1990) combined with a correction for cloud cover and then scaled to match the PAR values provided for the exercise. Spectral light is subsequently propagated in the water column with a bio-optical model with updated parameterizations of the inherent optical properties. All changes to the original implementation of Longhurst et al. (1995) are detailed by Mélin (2003).

Model 19: This model is an implementation of the Morel (1991) model in which the depth distribution of Chl-*a* is assumed constant throughout the water column. The broadband incident PAR is spectrally resolved using a look-up-table generated from a single run of the Gregg and Carder (1990) marine irradiance model where the effects of clouds and aerosols are essentially linearly scaled. The model uses 60-minute time and 10-m depth steps at 5-nm wavelength resolution when run using the global datasets (Smyth et al., 2005).

Model 20: This model derives spectral irradiance from PAR using Tanré et al. (1990), and assumes a vertically uniform Chl-*a* profile. Quantum yield is parameterized as a maximum value times both a light dependent term (Bidigare et al., 1992; Waters et al., 1994) and a temperature dependent term. Temperature dependence was assumed to

be sigmoidal, and was based on a vertical profile of temperature derived from SST and MLD.

Model 21: This model is identical to Model 20 except the temperature dependent term is removed.

### **Supplementary References**

Antoine, D., and Morel, A.: Oceanic primary production: I. Adaptation of a spectral light-photosynthesis model in view of application to satellite chlorophyll observations, *Global Biogeochem. Cy.*,10, 43-55, 1996.

Antoine, D., André, J. M., and Morel, A.: Oceanic primary production: II. Estimation at global scale from satellite (coastal zone color scanner) chlorophyll, *Global Biogeochem. Cy.*,10, 57-69, 1996.

Arrigo K. R., van Dijken, G. L., and Bushinsky, S.: Primary production in the Southern Ocean, 1997-2006, *J. Geophys. Res.*, 113, C08004, 2008.

Armstrong, R. A.: Optimality-based modeling of nitrogen allocation and photoacclimation in photosynthesis, *Deep-Sea Res. II*, 53, 513-531, 2006.

Asanuma, I.: Depth and Time Resolved Primary Productivity Model Examined for Optical Properties of Water, *Global Climate Change and Response of Carbon Cycle in the Equatorial Pacific and Indian Oceans and Adjacent Landmasses*, Elsevier Oceanography Series, 73, 89-106 pp, 2006.

Behrenfeld, M. J., and Falkowski, P. G.: Photosynthetic rates derived from satellite-based chlorophyll concentration, *Limnol. Oceanogr.*,42, 1-20, 1997.



Bidigare, R. R., Prézelin, B. B., and Smith, R. C.: Bio-optical models and the problems of scaling, in Primary Productivity and Biogeochemical Cycles in the Sea, Plenum Press, New York, pp. 175-212, 1992.

Bricaud, A., Morel, A., Babin, M., Allali, K., and Claustre, H.: Variations of light absorption by suspended particles with chlorophyll a concentration in oceanic (case 1) waters: Analysis and implications for bio-optical models, J. Geophys. Res., 103, 31033-31044, 1998.

Carr, M. E.: Estimation of potential productivity in Eastern Boundary Currents using remote sensing, Deep-Sea Res. II, 49, 59-80, 2002.

Cloern, J. E., Grenz, C., and Vidergar, L.: An empirical model of the phytoplankton chlorophyll:carbon ratio - the conversion factor between productivity and growth rate. Limnol. Oceanogr., 40, 1313–1321, 1995.

Eppley, R. W.: Temperature and phytoplankton growth in the sea, Fish. B. NOAA, 70, 1063-1085, 1972.

Eppley, R., Steward, E., Abbott, M., and Heyman, U.: Estimating ocean primary production from satellite CHL: Introduction to regional differences and statistics for the southern California Bight, J. Plankton Res., 7, 57-70, 1985.

Geider, R. J., MacIntyre, H. L., and Kana T. M.: A dynamic regulatory model of phytoplanktonic acclimation to light, nutrients, and temperature, Limnol. Oceanogr., 43, 679-694, 1998.

Gregg, W. W., and Carder, K. L.: A simple spectral solar irradiance model for cloudless maritime atmospheres, *Limnol. Oceanogr.*, 35, 1657-1675, 1990.

Howard, K. L., and Yoder, J. A.: Contribution of the sub-tropical oceans to global primary production, in *Proceedings of COSPAR Colloquium on Space Remote Sensing of Subtropical Oceans*, edited by C.-T. Liu, pp. 157-168, Pergamon, New York, 1997.

Kahru, M., and Mitchell, B. G.: Seasonal and nonseasonal variability of satellite-derived chlorophyll and colored dissolved organic matter concentration in the California Current, *J. Geophys. Res.*, 106, 2517-2529, 2001.

Kameda, T. and Ishizaka, J.: Size-fractionated primary production estimated by a two-phytoplankton community model applicable to ocean color remote sensing, *J. Oceanogr.*, 61, 663-672, 2005.

Longhurst, A., Sathyendranath, S., Platt, T., and Caverhill, C.: An estimate of global primary production in the ocean from satellite radiometer data, *J. Plankton Res.*, 17, 1245-1271, 1995.

Mélin, F.: Potentiel de la télédétection pour l'analyse des propriétés optiques du système océan-atmosphère et application à l'estimation de la photosynthèse phytoplanctonique, Ph.D. dissertation, Université Paul Sabatier, Toulouse, France, 2003.

- Morel, A. (1991), Light and marine photosynthesis - A spectral model with geochemical and climatological implications, *Prog. Oceanogr.*, 26, 263-306.
- Morel, A., Antoine, D., Babin, M., and Dandonneau, Y.: Measured and modeled primary production in the northeast Atlantic (EUMELI JGOFS program): The impact of natural variations in photosynthetic parameters on model predictive skill, *Deep-Sea Res. II*, 43, 1273-1304, 1996.
- Morel, A., and Berthon, J. F.: Surface pigments, algal biomass profiles, and potential production of the euphotic layer - Relationships reinvestigated in view of remote-sensing applications, *Limnol. Oceanogr.*, 34, 1545-1562, 1989.
- Morel, A. and Maritorena, S.: Bio-optical properties of oceanic waters: A reappraisal, *J. Geophys. Res.*, 106, 7163-7180, 2001.
- Ondrusek, M. E., Bidigare, R. R., Waters, K., and Karl D. M.: A predictive model for estimating rates of primary production in the subtropical North Pacific Ocean, *Deep-Sea Res. II*, 48, 1837-1863, 2001.
- Platt, T. and Sathyendranath, S.: Oceanic primary production: estimation by remote sensing at local and regional scales, *Science*, 241, 1613-1620, 1988.
- Platt, T. and Sathyendranath, S.: Estimators of primary production for interpretation of remotely-sensed data on ocean color. *J. Geophys. Res.*, 98, 14561–14576, 1993.
- Scardi, M.: Neuronal network models of phytoplankton primary production, in *Artificial Neuronal Networks: Application to Ecology and Evolution*, edited by Lek, S.G. J.-F, pp. 115-129, Springer, Berlin/Heidelberg, 2000.

Scardi, M.: Advances in neural network modeling of phytoplankton primary production, *Ecol. Model.*, 146, 33-45, 2001.

Smyth, T. J., Tilstone, G. H., and Groom, S. B.: Integration of radiative transfer into satellite models of ocean primary production, *J. Geophys. Res.*, 110, C10014, 2005.

Tang, S., Chen, C., Zhan, H., and Zhang, T.: Determination of ocean primary productivity using support vector machines, *Int. J. Remote Sens.* 29, 6227-6236, 2008.

Tanré, D., Deroo, C., Duhaut, P., Herman, M., Morcrette, J. J., Perbos, J., and Deschamps, P. Y.: Description of a computer code to simulate the satellite signal in the solar spectrum - The 5S code, *Int. J. Remote Sens.*, 11, 659-668, 1990.

Uitz, J., Claustre, H., Morel, A., and Hooker, S. B.: Vertical distribution of phytoplankton communities in open ocean: An assessment based on surface chlorophyll, *J. Geophys. Res.*, 111, C08005, 2006.

Uitz, J., Yannick, H., Bruyant, F., Babin, M., and Caustre, H.: Relating phytoplankton photophysiological properties to community structure on large scales, *Limnol. Oceanogr.*, 53, 614-630, 2008.

Waters, K. J., Smith, R. C., and Marra, J.: Phytoplankton production in the Sargasso Sea as determined using optical mooring data, *J. Geophys. Res.*, 99, 18385-18402, 1994.

Wozniak, B., Dera, J., Ficek, D., and Majchrowski, R.: Modeling light and photosynthesis in the marine environment, *Oceanologia* 45, 171-245, 2003.

Yamada, K., Ishizaka, J., and Nagata, H.: Spatial and temporal variability of satellite primary production in the Japan Sea from 1998 to 2002, *J. Oceanogr.*, 61, 857-869, 2005.
